# Supplementary material for: Highly efficient photoelectrocatalytic reduction of CO2on the Ti3C2/g-C3N4heterojunction with rich Ti3+and pyri-N species
Source: Royal Society of Chemistry journal article supplement (doi:10.1039/c8ta03315c), 2018-01-01
Supplement: c8ta03315c1.pdf [file c8ta03315c1.pdf]

**Highly efficient photoelectrocatalytic reduction of CO<sub>2</sub> on the  
Ti<sub>3</sub>C<sub>2</sub>/g-C<sub>3</sub>N<sub>4</sub> heterojunction with rich Ti<sup>3+</sup> and pyri-N species**

Yanjie Xu,<sup>a</sup> Shuai Wang,<sup>b</sup> Jun Yang,<sup>\*b</sup> Bo Han,<sup>a</sup> Rong Nie,<sup>a</sup> Jixian Wang,<sup>a</sup> Yapeng  
Dong,<sup>a</sup> Xiaogang Yu,<sup>a</sup> Jianguo Wang<sup>c</sup> and Huanwang Jing <sup>\*a,c</sup>

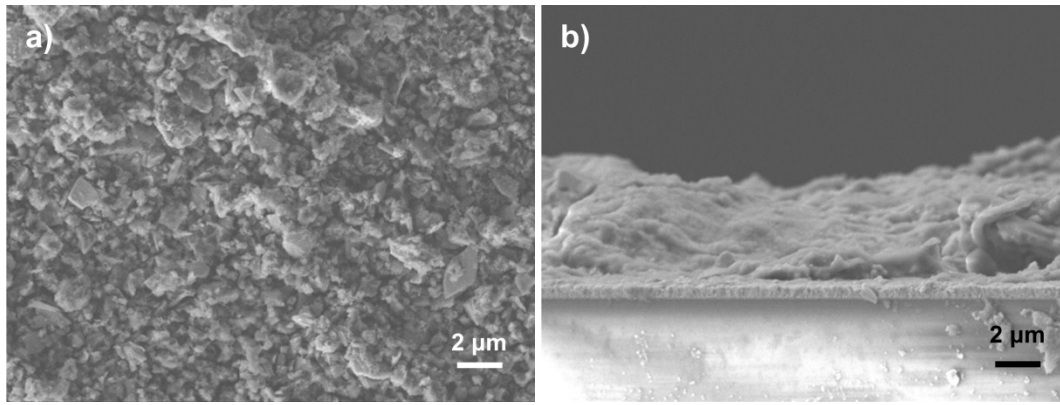

**Figure S1.** (a) FESEM image and (b) cross-sectional SEM image of Pd-TCCN photocathode

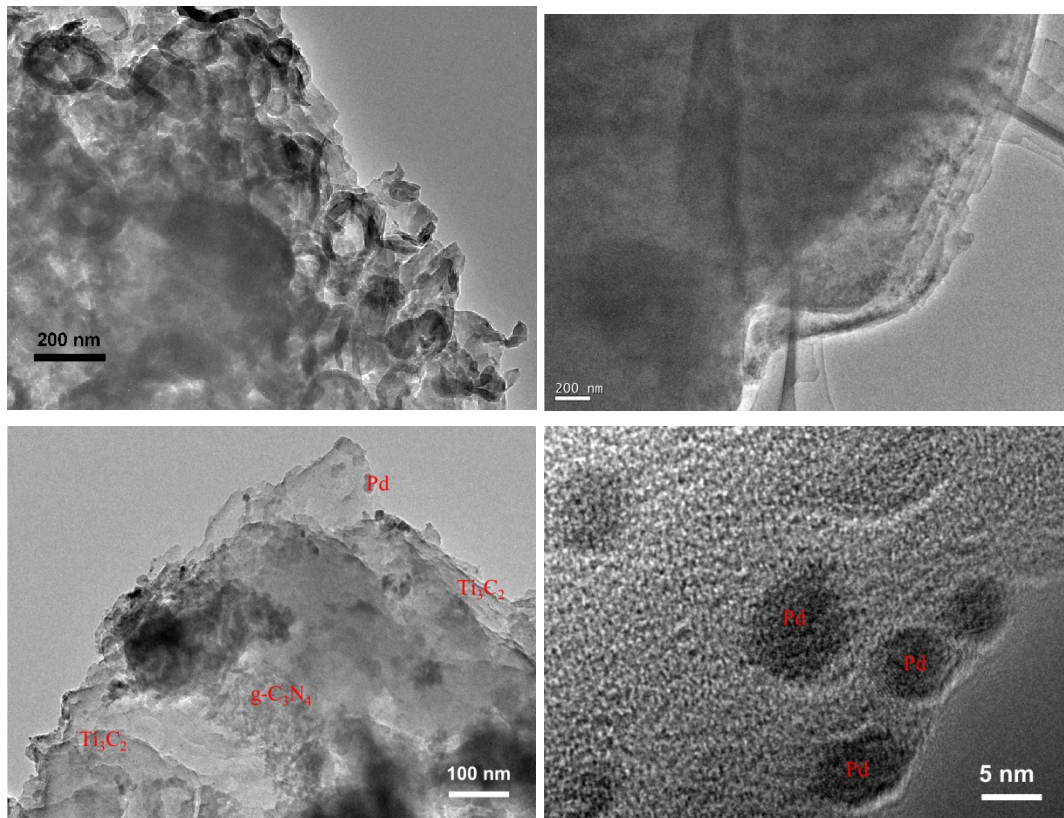

**Figure S2.** TEM images of (a) g-C<sub>3</sub>N<sub>4</sub>, (b) Ti<sub>3</sub>C<sub>2</sub> and (c,d) Pd-TCCN<sub>3</sub>

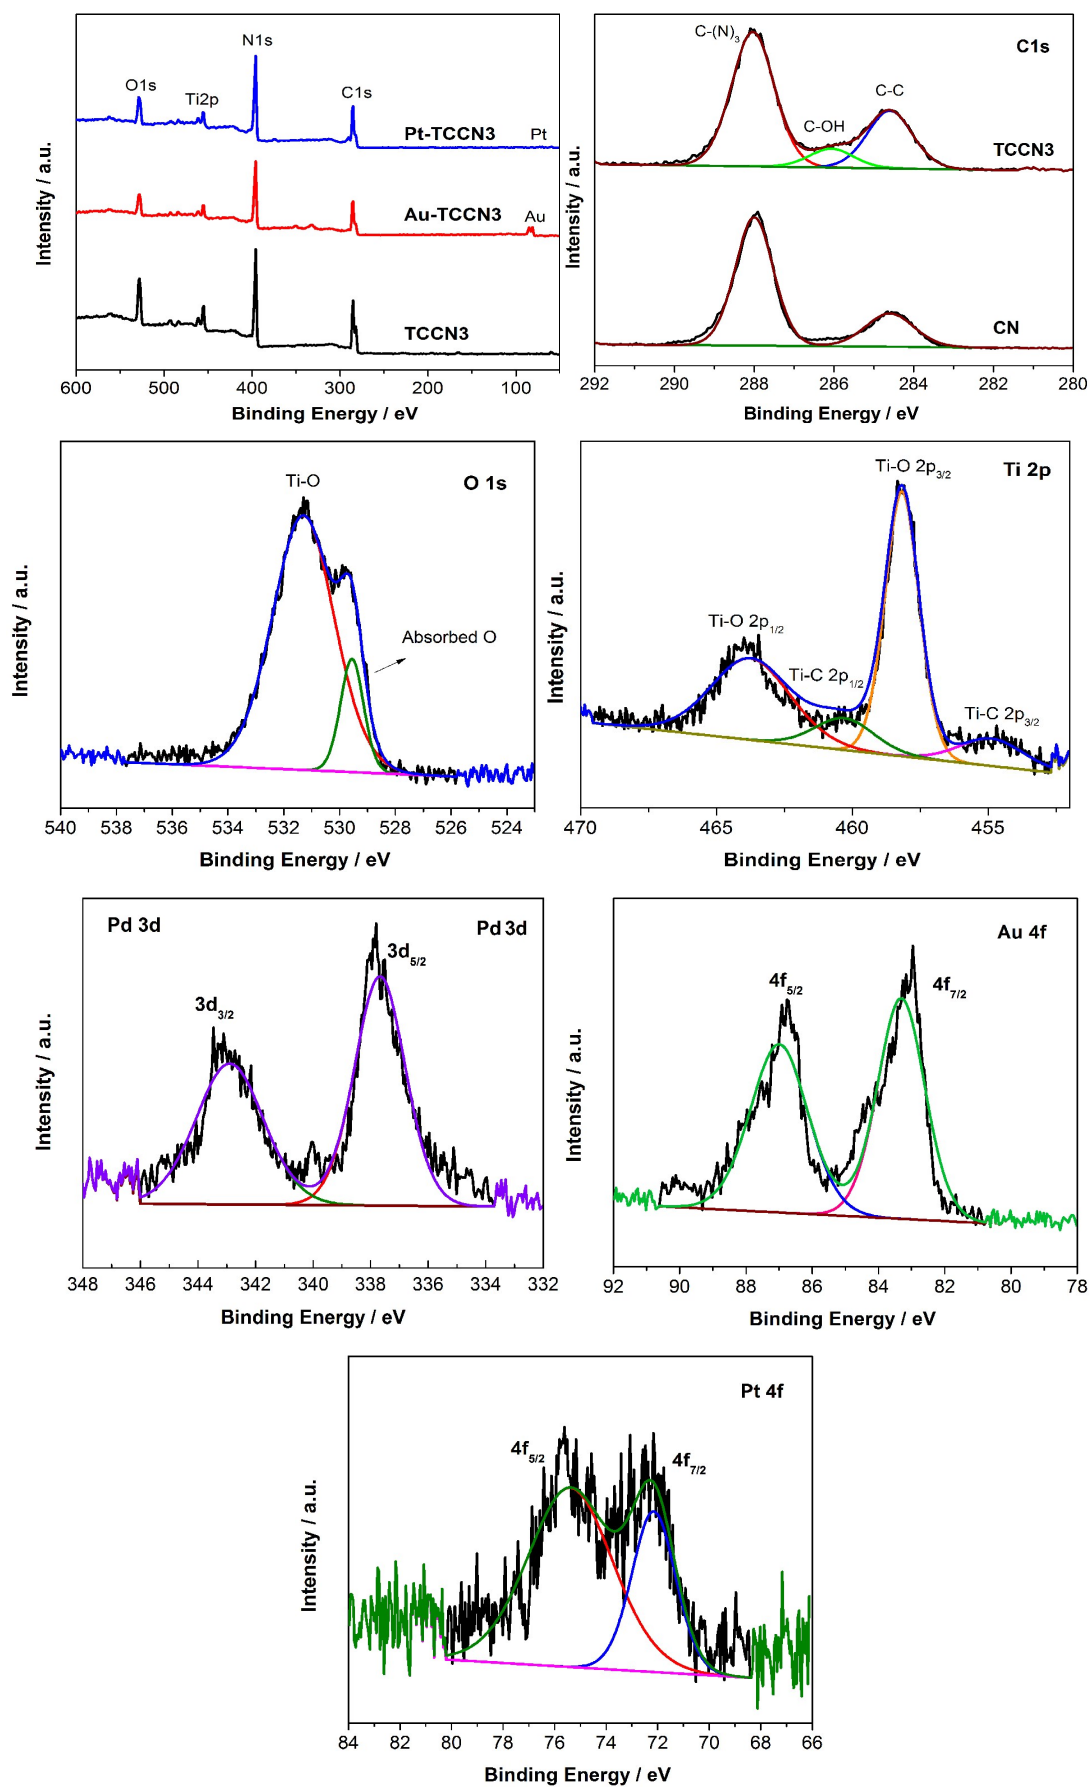

**Figure S3.** (a) XPS survey spectra of TCCN3, Au-TCCN3 and Pt-TCCN3 electrodes,

high-resolution XPS spectra of (b) C 1s (c) O 1s, (d) Ti 2p (e) Pd 1s, (f) Au 4f, and (g) Pt 4f

**Table S1.** The N 1s species and concentration in CN and TCCN3 electrodes

| Sample | C-N-C | N-(C) <sub>3</sub> | N-H  |
|--------|-------|--------------------|------|
| CN     | 45.2  | 34                 | 20.8 |
| TCCN3  | 57.2  | 36.6               | 6.2  |

**Table S2.** The BET surface area, pore volume and pore size of all samples

| Sample | S <sub>BET</sub> (m <sup>2</sup> g <sup>-1</sup> ) | Pore volume (cm <sup>3</sup> g <sup>-1</sup> ) | Pore size (nm) |
|--------|----------------------------------------------------|------------------------------------------------|----------------|
| CN     | 20.9                                               | 0.129                                          | 24.9           |
| TCCN1  | 21.6                                               | 0.095                                          | 17.7           |
| TCCN2  | 28.2                                               | 0.106                                          | 15.1           |
| TCCN3  | 17.3                                               | 0.059                                          | 13.6           |

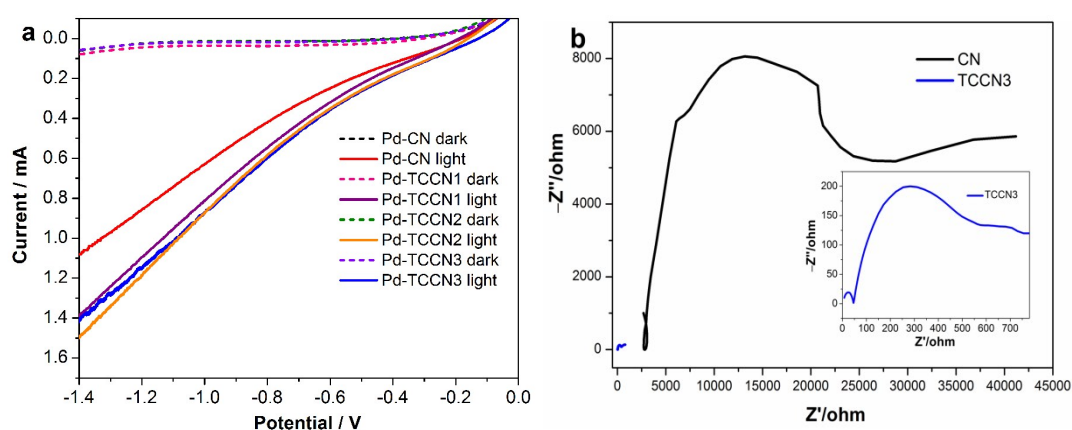

**Figure S4.** (a) LSV curves under dark and light irradiation conditions of different photocathodes and (b) EIS Nyquist plots of pristine CN and TCCN3 photocathodes

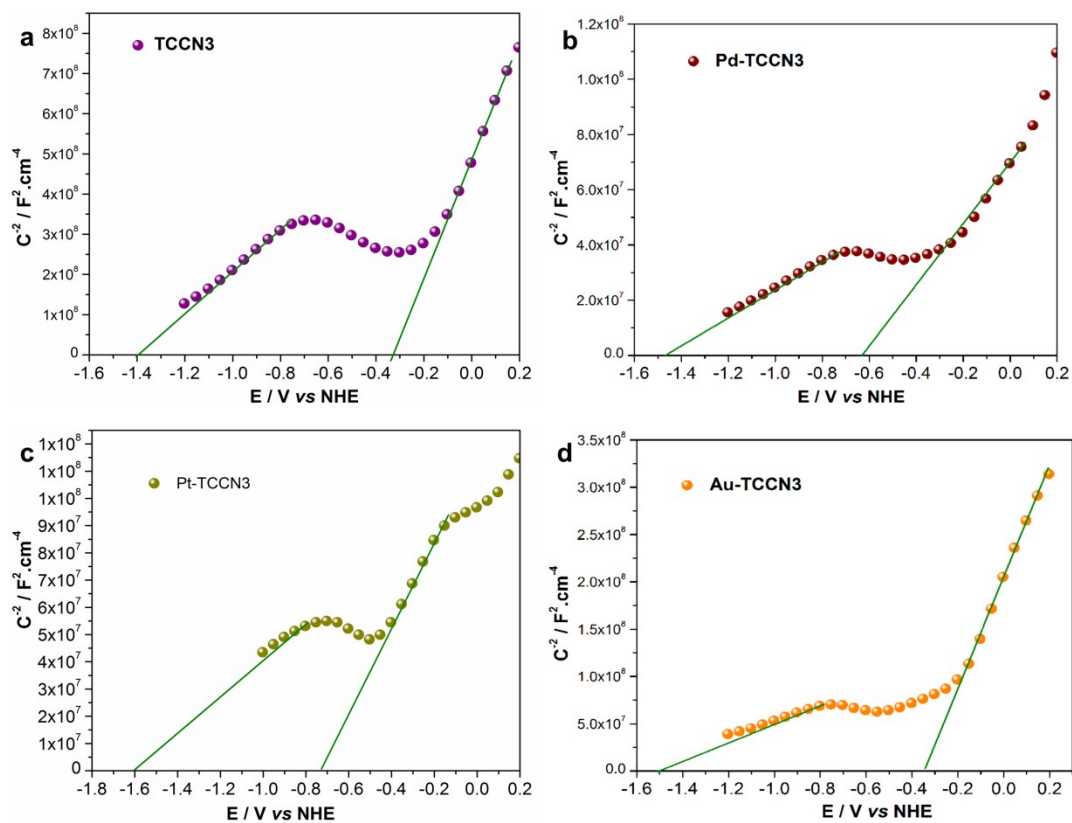

**Figure S5.** Mott-Schottky plots of TCCN3 and M-TCCN3 photocathodes

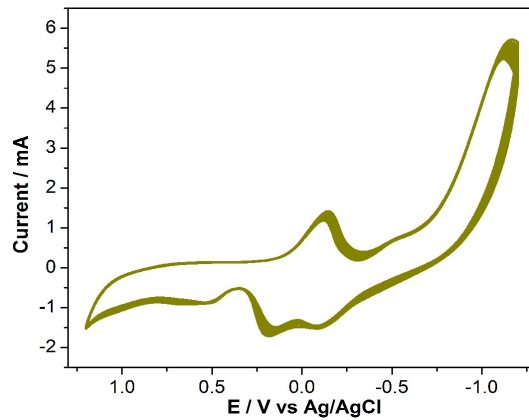

**Figure S6.** 100 continuous cyclic voltammograms of Pd-TCCN3 photocathode obtained at a scan rate of  $50 \text{ mV s}^{-1}$  in  $\text{CO}_2$  saturated  $\text{KHCO}_3$  (0.1 M) aqueous solution at dark condition

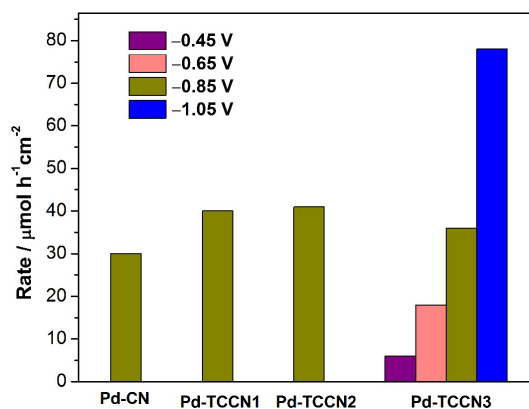

**Figure S7.** The H<sub>2</sub> evolution rate for different photocathodes of Pd-CN, Pd-TCCN1, and Pd-TCCN2 at -0.85 V; and for Pd-TCCN3 at -0.45V ~ -1.05 V in the two-electrode system

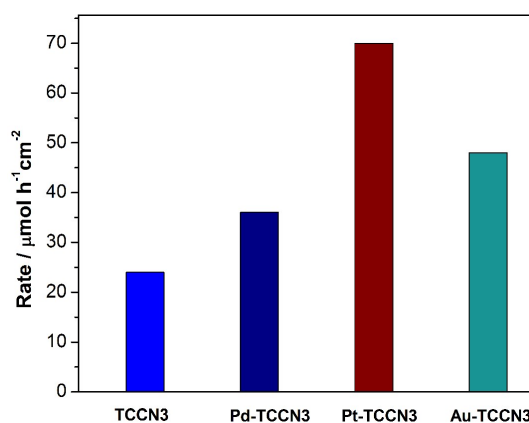

**Figure S8.** The H<sub>2</sub> evolution rate for different photocathodes of TCCN3, Pd-TCCN3, Pt-TCCN3 and Au-TCCN3 at -0.85 V in the two-electrode system

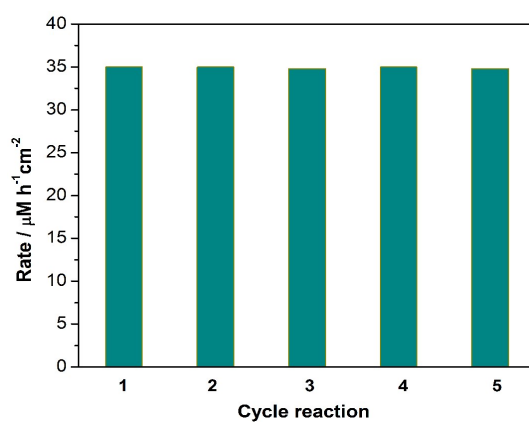

**Figure S9.** Five cycles of reaction with Pd-TCCN3 served as the photocathode at -

0.85 V (HCOO<sup>-</sup>) in the two-electrode system

**Table S3.** The selectivity of liquid products for different photocathode at different voltage

| Photocathode | Voltage (V) | S <sub>HCOO<sup>-</sup></sub> (%) | S <sub>MeOH</sub> (%) |
|--------------|-------------|-----------------------------------|-----------------------|
| Pd-CN        | -0.85       | 82.4                              | 17.6                  |
| Pd-TCCN1     | -0.85       | 62.1                              | 37.9                  |
| Pd-TCCN2     | -0.85       | 66.6                              | 33.4                  |
| Pd-TCCN3     | -0.85       | 72.1                              | 27.9                  |
| TCCN3        | -0.85       | 0                                 | 100                   |
| Pt-TCCN3     | -0.85       | 0                                 | 100                   |
| Au-TCCN3     | -0.85       | 0                                 | 100                   |
| Pd-TCCN3     | -0.45       | 0                                 | 100                   |
| Pd-TCCN3     | -0.65       | 49.8                              | 30.2                  |
| Pd-TCCN3     | -1.05       | 80.6                              | 19.4                  |

\* Selectivity (S)

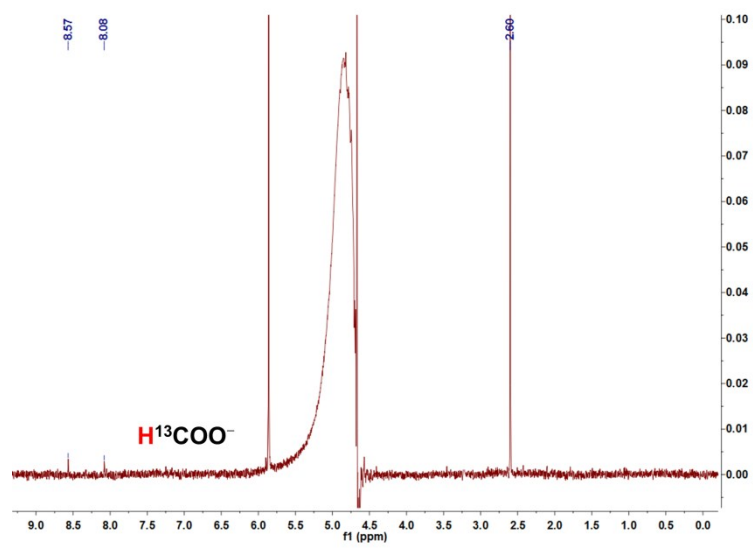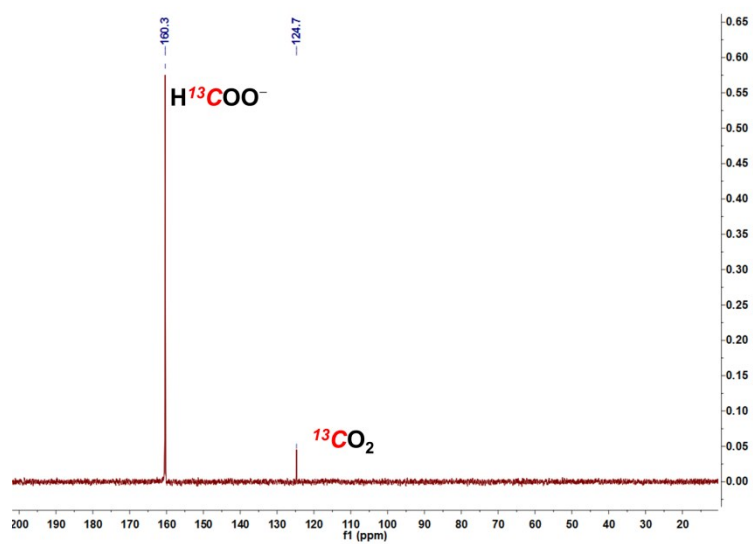

**Figure S10.**  $^1\text{H}$  NMR and  $^{13}\text{C}$  NMR spectra of the isotope labeling experiment results
